# Supplementary material for: Deciphering calcium-binding behaviors of casein phosphopeptides by experimental approaches and molecular simulation
Source: Royal Society of Chemistry journal article supplement (doi:10.1039/d0fo00844c), 2020-01-01

**Table S1** Experimental table of response surface methodology

| Factors                 | levels |     |     |
|-------------------------|--------|-----|-----|
|                         | -1     | 0   | 1   |
| CPP/Calcium (mg/mg CPP) | 1:2    | 1:4 | 1:6 |
| pH                      | 7.5    | 8   | 8.5 |
| Temperature (°C)        | 20     | 30  | 40  |
| Time (min)              | 10     | 20  | 30  |

**Table S2** Results of regression and variance analysis

|                | Sum of squares | Variance | Mean square | F value | Pr>F     | Significant     |
|----------------|----------------|----------|-------------|---------|----------|-----------------|
| Model          | 0.3485         | 14       | 0.0249      | 6.9113  | 0.0004   | Significant     |
| A              | 0.2187         | 1        | 0.2187      | 60.7228 | < 0.0001 | **              |
| B              | 0.0044         | 1        | 0.0044      | 1.2210  | 0.2878   |                 |
| C              | 0.0286         | 1        | 0.0286      | 7.9309  | 0.0137   | *               |
| D              | 0.0083         | 1        | 0.0083      | 2.3053  | 0.1512   |                 |
| AB             | 0.0001         | 1        | 0.0001      | 0.0411  | 0.8423   |                 |
| AC             | 0.0122         | 1        | 0.0122      | 3.3796  | 0.0873   |                 |
| AD             | 0.0237         | 1        | 0.0237      | 6.5712  | 0.0225   | *               |
| BC             | 0.0007         | 1        | 0.0007      | 0.1869  | 0.6721   |                 |
| BD             | 0.0006         | 1        | 0.0006      | 0.1691  | 0.6871   |                 |
| CD             | 0.0170         | 1        | 0.0170      | 4.7255  | 0.0474   | *               |
| A <sup>2</sup> | 0.0174         | 1        | 0.0174      | 4.8190  | 0.0455   | *               |
| B <sup>2</sup> | 0.0030         | 1        | 0.0030      | 0.8304  | 0.3776   |                 |
| C <sup>2</sup> | 0.0038         | 1        | 0.0038      | 1.0607  | 0.3205   |                 |
| D <sup>2</sup> | 0.0039         | 1        | 0.0039      | 1.0698  | 0.3185   |                 |
| Residue        | 0.0504         | 14       | 0.0036      |         |          |                 |
| Lack of fit    | 0.0449         | 10       | 0.0045      | 3.2588  | 0.1331   | Not significant |
| Pure error     | 0.0055         | 4        | 0.0014      |         |          |                 |
| Core total     | 0.3990         | 28       |             |         |          |                 |

P<0.01: \*\* extremely significant; P<0.05: \* significant; P>0.05: Not significant.

## Figure captions

**Figure S1** Effects of the mass ratios of (a) CPPs/calcium, (b) pH, (c) temperature and (d) time on calcium-binding capacity of CPPs

**Figure S2** The four representative snapshots selected among 5000 structures from five trajectories evaluated by SPICKER software.

**Figure S1**

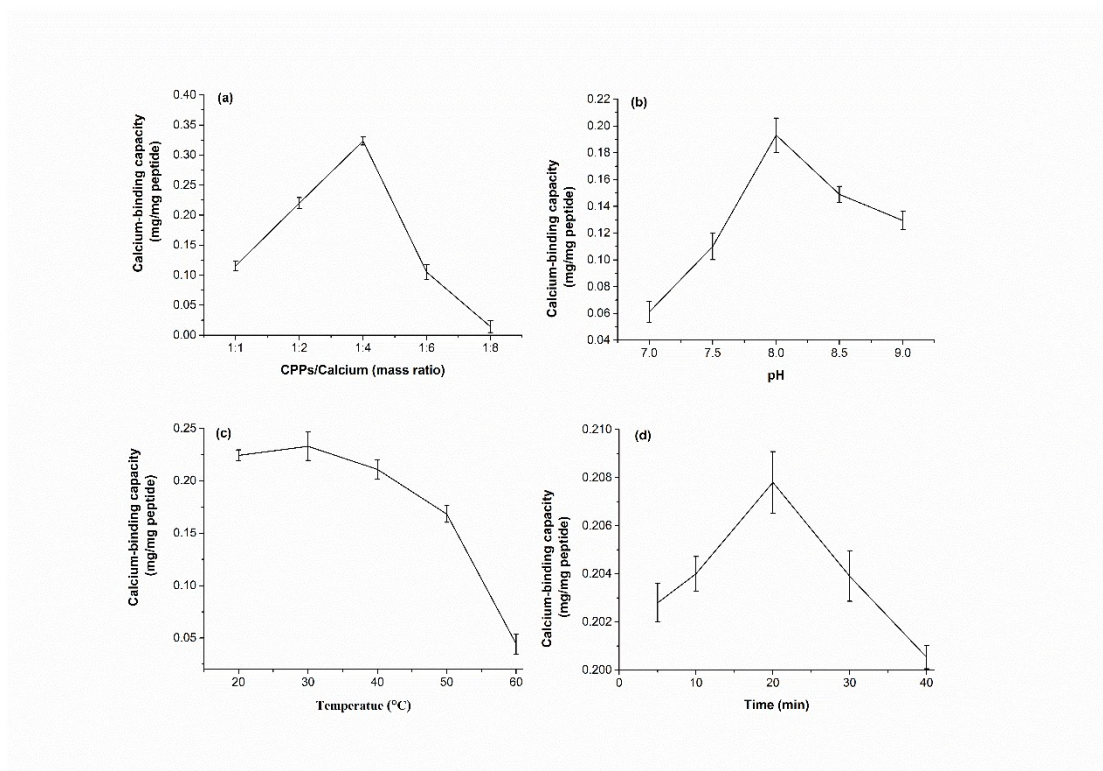

**Figure S2**

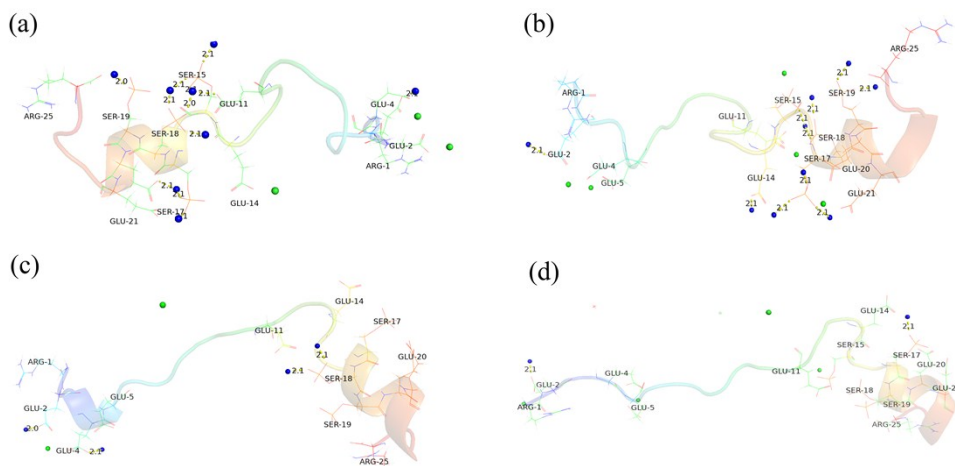

Supplement: d0fo00844c1.pdf [file d0fo00844c1.pdf]
